# Supplementary material for: Ensuring Fact-Based Metabolite Identification in Liquid Chromatography–Mass Spectrometry-Based Metabolomics
Source: PubMed Central journal article supplement (PMC9979140; doi:10.1021/acs.analchem.2c05192), 2023-02-15
Supplement: ac2c05192_si_001.pdf [file ac2c05192_si_001.pdf]

## Supporting Information

### Ensuring Fact-Based Metabolite Identification in LC-MS-Based Metabolomics

Georgios Theodoridis\*<sup>1,2,3</sup>, Helen Gika<sup>2,3,4</sup>, Daniel Raftery<sup>5,6</sup>, Royston Goodacre<sup>7</sup>, Robert S. Plumb<sup>8</sup>, Ian D. Wilson\*<sup>7,9</sup>

<sup>1</sup> Department of Chemistry, Aristotle University of Thessaloniki, 54124, Greece

<sup>2</sup> Biomic AUTH, Center for Interdisciplinary Research and Innovation (CIRI-AUTH), Balkan Center B1.4, 10th km Thessaloniki-Thermi Rd, P.O. Box 8318, GR 57001 Thessaloniki, Greece

<sup>3</sup> FoodOmicsGR, AUTH node, Center for Interdisciplinary Research and Innovation (CIRI-AUTH), Balkan Center B1.4, 10th km Thessaloniki-Thermi Rd, P.O. Box 8318, GR 57001 Thessaloniki, Greece

<sup>4</sup> Laboratory of Forensic Medicine and Toxicology, Department of Medicine, Aristotle University, 54124 Thessaloniki, Greece.

<sup>5</sup> Northwest Metabolomics Research Center

<sup>6</sup> Mitochondria Metabolism Center, Anesthesiology and Pain Medicine, University of Washington, Seattle, WA 98109

<sup>7</sup> Centre for Metabolomics Research, Department of Biochemistry and Systems Biology, Institute of Systems, Molecular and Integrative Biology, University of Liverpool, BioSciences Building, Crown St., Liverpool, L69 7ZB, UK

<sup>8</sup> Scientific Operations, Waters Corporation, IMMERSE, Cambridge, 02142, MA, United States

<sup>9</sup> Division of Systems Medicine, Department of Metabolism, Digestion and Reproduction, Imperial College London, Hammersmith Campus, London, W12 0NN, UK

\* correspondence [gtheodor@chem.auth.gr](mailto:gtheodor@chem.auth.gr),

[i.wilson@imperial.ac.uk](mailto:i.wilson@imperial.ac.uk)

**Table S1: Examples<sup>#</sup> of identifications showing unrealistic elution orders in RPLC-MS systems\***

|           | RT(min) | Metabolites Names and characteristic LogKow values |
|-----------|---------|----------------------------------------------------|
| Example 1 | 2.99    | <i>LysoPC(15:0)</i>                                |
|           | 3.41    | Phenylalanine                                      |
|           | 3.62    | Glucose                                            |
|           | 4.27    | Citric acid                                        |
|           | 9.14    | Lactic acid                                        |
|           | 8.11    | Aspartic acid -4.32                                |
|           | 8.29    | <i>LysoPC(15:0)</i>                                |
|           | 9.53    | Lactic acid -0.65                                  |
| Example 2 | 4.27    | <i>Palmitic acid</i> 6.96                          |
|           | 4.50    | 1-Methylhistamine                                  |
|           | 4.60    | 5-Hydroxy-L-tryptophan                             |
|           | 4.86    | L-Lysine -2.99                                     |
|           | 5.08    | <i>2-Hydroxydecanedioic acid</i>                   |
|           | 5.09    | Asymmetric dimethylarginine                        |
|           | 5.09    | 4-Hydroxynonenal                                   |
|           | 5.09    | L-alpha-Aminobutyric acid                          |
| Example 3 | 2.09    | Isocitric acid -2.01                               |
|           | 2.21    | <i>Arachidonic acid</i> 8.07                       |
|           | 2.49    | <i>18-Hydroxycorticosterone</i>                    |
|           | 3.55    | Glucose -2.89                                      |
|           | 3.67    | <i>11-Dehydrocorticosterone</i> 1.77               |
|           | 4.45    | L-Leucine                                          |
|           | 5.09    | D-Ornithine                                        |
|           | 5.24    | Mevalonic acid-5P                                  |
|           | 5.31    | Glycine -3.41                                      |
|           | 6.91    | <i>Eicosadienoic acid</i> 8.50                     |
|           | 7.56    | Deoxyuridine -1.19                                 |
| Example 4 | 3.37    | <i>PC(18:1(9Z)/0:0)</i>                            |
|           | 3.76    | <i>Arachidonic acid</i> 8.07                       |
|           | 5.21    | <i>Lysopc(16:1(9Z)/0:0)</i>                        |
|           | 11.79   | <i>Lysopc(18:1(11Z))</i>                           |
|           | 13.18   | L-Asparagine -4.99                                 |
|           | 13.22   | <i>PC(18:2(9Z,12Z)/18:1(11Z))</i>                  |
|           | 17.95   | Glutathione                                        |
|           | 21.13   | Guanosine diphosphate -5.55                        |

\*Apolar analytes = italics, more polar analytes = normal font

LogKow were obtained from Chemspider. RPLC theory dictates that increase in analyte log Kow results to increase in  $t_R$ . Here this relationship is not observed and values are clearly in disarray.

The numbers are reproduced as found in their sources but in some cases  $t_R$  values have been reduced to 2 digits.

#Studies are anonymised.
